# Supplementary material
Source: PubMed Central journal article supplement (PMC2922127)
Supplement: 0910488107_pnas.200910488SI.pdf [file 0910488107_pnas.200910488SI.pdf]

# Supporting Information

Ohsawa et al. 10.1073/pnas.0910488107

## SI Materials and Methods

**Construction.** pEX-Sema7A-Fc was kindly provided by A. L. Kolodkin (The Johns Hopkins University School of Medicine, Baltimore) (1). Caspase-cleaved N-terminal fragment of Sema7A (1–236aa) were subcloned into pEX.

**Cells, Transfection, and Immunoblotting.** Neuro2a cells were cultured in DMEM containing 10% FBS and 2 mM L-glutamine. Cells were transfected using Lipofectamine 2000 reagent (Invitrogen) fol-

lowing the manufacturer's instructions. Methods used for immunoblotting have been described previously (2). The following antibodies were used at the indicated dilutions: rabbit monoclonal anti-p44/42 MAPK (Erk1/2) (137F5) (Cell Signaling; 1:2,000), rabbit monoclonal anti-phospho-p44/42 MAPK (Erk1/2)(Thr202/Tyr204) (D13.4.4E)XP (Cell Signaling; 1:2,000), goat polyclonal anti-human IgG Fc (1:5,000; Jackson ImmunoResearch Laboratories), and mouse monoclonal anti- $\beta$ -tubulin (Millipore Bioscience Research Reagents; 1:1,000).

1. Pasterkamp RJ, Peschon JJ, Spriggs MK, Kolodkin AL (2003) Semaphorin 7A promotes axon outgrowth through integrins and MAPKs. *Nature* 424:398–405.

2. Ohsawa S, Hamada S, Yoshida H, Miura M (2008) Caspase-mediated changes in histone H1 in early apoptosis: Prolonged caspase activation in developing olfactory sensory neurons. *Cell Death Differ* 15:1429–1439.

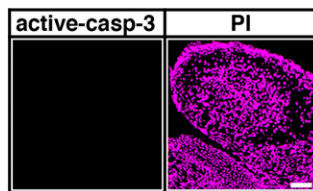

**Fig. S1.** Apaf-1-mediated caspase-3 activation in the olfactory system. An E16.5 *apaf-1*-deficient OB coronal section was stained with the anti-active-caspase-3 antibody (green). Cell nuclei were visualized by propidium iodide (PI; magenta) staining. (Scale bar, 50  $\mu$ m.)

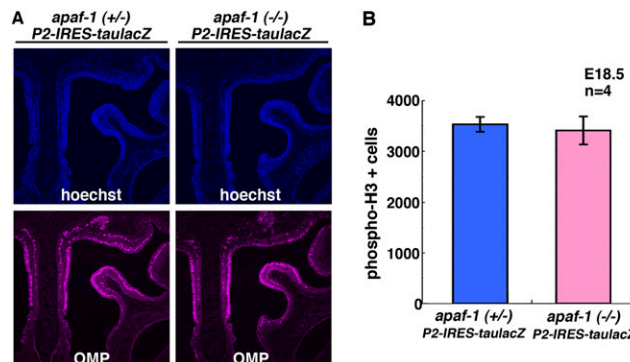

**Fig. S2.** Neither distribution of OMP-positive mature OSNs nor the number of mitotic cells in the OE were affected in *apaf-1*<sup>-/-</sup> mice. (A) Coronal sections (5- $\mu$ m thick) of E18.5 *apaf-1* P2-IRES-taulacZ<sup>+/+</sup> and <sup>-/-</sup> mice were stained with anti-OMP antibody (magenta). Cell nuclei were visualized by Hoechst 33342 staining (blue). (B) Serial coronal sections (5- $\mu$ m thick) were prepared from entire OE of E18.5 *apaf-1*<sup>+/+</sup> and *apaf-1*<sup>-/-</sup> P2-IRES-taulacZ mice and stained with anti-phospho-H3 antibody. Phospho-H3-positive cells in every 10th section were counted. Values are mean  $\pm$  SEM ( $n = 4$ ;  $t$  test,  $P < 0.01$ ). (Scale bar, 200  $\mu$ m.)

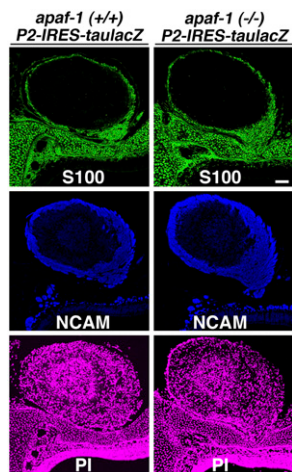

**Fig. 53.** S100-positive olfactory ensheathing cells were not affected in the OE of *apaf-1*<sup>-/-</sup> mice. Coronal sections (5  $\mu$ m thick) of E18.5 *apaf-1*<sup>+/+</sup> and *apaf-1*<sup>-/-</sup> mice were stained with anti-S100 (green) and anti-NCAM (blue) antibody. Cell nuclei were visualized by PI staining (magenta). (Scale bar, 100  $\mu$ m.)

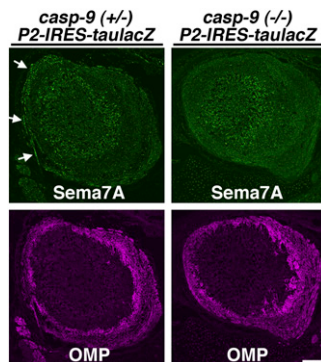

**Fig. 54.** Caspase-9-dependent cleavage of Sema7A in the developing olfactory system. Coronal sections (5  $\mu$ m thick) of E17.5 *caspase-9*<sup>+/+</sup> or *caspase-9*<sup>-/-</sup> *P2-IRES-taulacZ* OB were stained with anti-Sema7A (green) and anti-OMP (magenta) antibodies. Arrows show Sema7A-positive axons. (Scale bar, 100  $\mu$ m.)

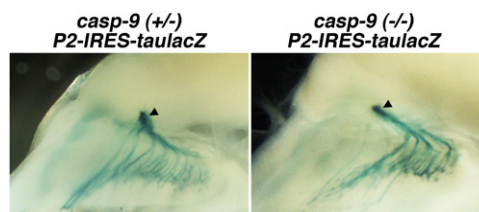

**Fig. 55.** Impaired development of P2 glomeruli in *caspase-9*<sup>-/-</sup> mice. View of nasal septum and medial aspect of the OB of E18.5 *caspase-9*<sup>+/+</sup> (A) and *caspase-9*<sup>-/-</sup> *P2-IRES-taulacZ* (B) mice. Arrowheads show P2 glomeruli in their mice.

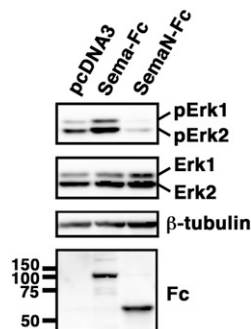

**Fig. 56.** Caspase-cleaved fragment of Sema7A fails to induce Erk1/2 phosphorylation in Neuro2a cells. Neuro2a cells were transfected with either pcDNA3, Fc-tagged full-length Sema7A-pEX (Sema-Fc), Fc-tagged caspase-cleaved N-terminal fragment of Sema7A-pEX (SemaN-Fc). Whole-cell extracts were analyzed by immunoblotting using anti-phospho-Erk1/2 (Thr202/Thr204), anti-Erk1/2, anti- $\beta$ -tubulin, and anti-Fc antibodies.
